# Supplementary material for: Fabrication of high coverage MASnI3 perovskite films for stable, planar heterojunction solar cells
Source: Royal Society of Chemistry journal article supplement (doi:10.1039/c6tc05069g), 2017-01-01
Supplement: c6tc05069g1.pdf [file c6tc05069g1.pdf]

## Electronic Supplementary Information

### **Fabrication of high coverage $\text{MASnI}_3$ perovskite films for stable, planar heterojunction solar cells**

Takashi Fujihara,<sup>a, b</sup> Shinobu Terakawa,<sup>c</sup> Toshinori Matsushima,<sup>c, d</sup> Chuanjiang Qin,<sup>c, e</sup>  
Masayuki Yahiro,<sup>a, b</sup> and Chihaya Adachi<sup>a, b, c, d, e, \*</sup>

<sup>a</sup>Innovative Organic Device Laboratory, Institute of Systems, Information Technologies and Nano-technologies (ISIT), 744 Motooka, Nishi, Fukuoka 819-0395, Japan.

<sup>b</sup>Fukuoka i<sup>3</sup>-Center for Organic Photonics and Electronics Research (i<sup>3</sup>-OPERA), 5-14, kyudaishinmachi, Nishi-ku, Fukuoka 819-0388, Japan.

<sup>c</sup>Center for Organic Photonics and Electronics Research (OPERA), Kyushu University, 744 Motooka, Nishi, Fukuoka 819-0395, Japan.

<sup>d</sup>International Institute for Carbon Neutral Energy Research (WPI-I2CNER), Kyushu University, 744 Motooka, Nishi, Fukuoka 819-0395, Japan

<sup>e</sup>Japan Science and Technology Agency (JST), ERATO, Adachi Molecular Exciton Engineering Project, Fukuoka 819-0395, Japan

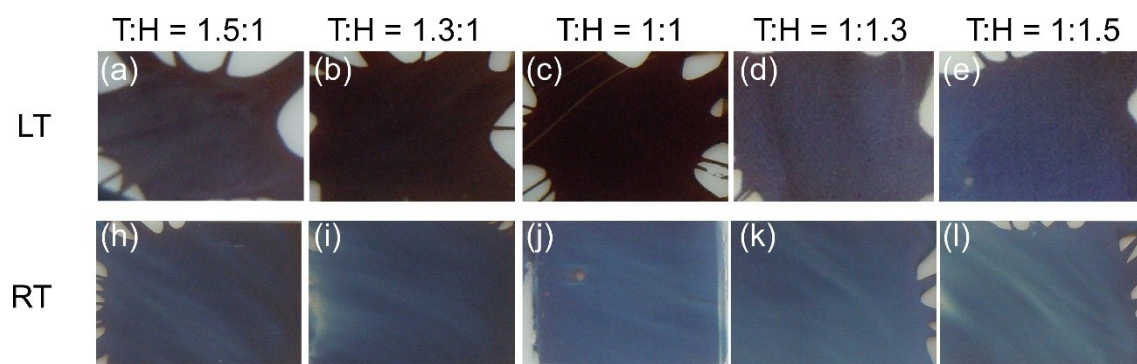

Fig. S1 Photographs of the perovskite films fabricated with different ratios of toluene and hexane on the PEDOT:PSS coated glass substrate. The toluene:hexane ratio was changed from 1.5:1 (a, h) to 1:1.5 (e, l) at different temperatures, namely at 13 °C (LT, a–e) and at 25 °C (RT, h–l).

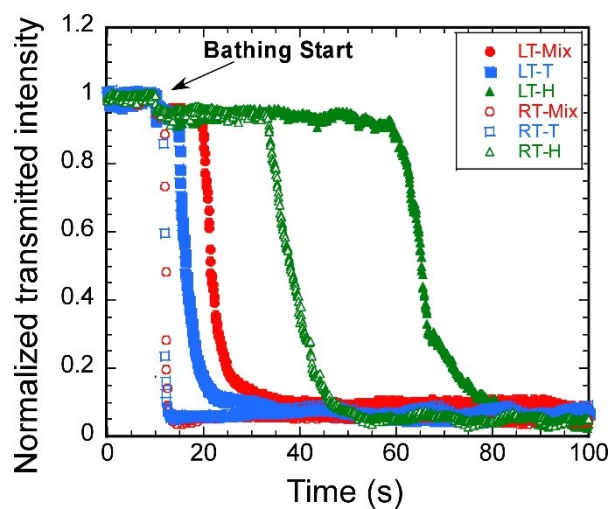

Fig. S2 Temporal change of transmittance of the perovskite films during bathing in the different anti-solvent conditions. The solid and open symbols indicate the temperature of the anti-solvents, namely 13 °C (LT-) and 25 °C (RT-), respectively. Whether toluene and hexane (Mix), toluene (T), or hexane (H) was used as the co-solvent was indicated by circles, squares, or triangles, respectively.

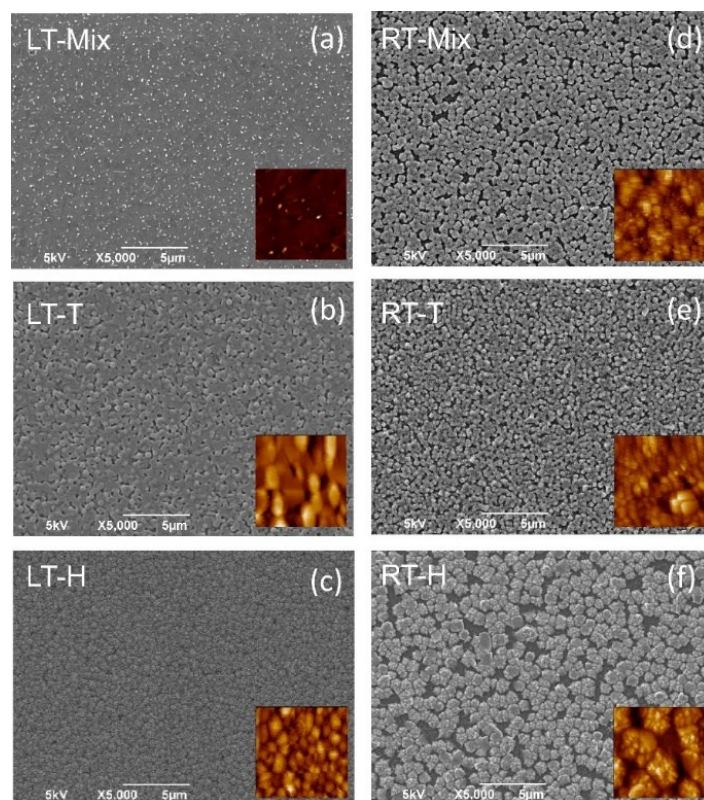

Fig. S3 Scanning electron microscopy (SEM) images and atomic force microscopy (AFM) images for the different conditions. LT-Mix (a), LT-T (b), and LT-H (c) indicate using mixed solvent, toluene, and hexane, respectively, at a temperature of 13 °C (LT-). RT-Mix (d), RT-T (e), and RT-H (f) indicate using mixed solvent, toluene, and hexane, respectively, at a temperature of 25 °C (RT-). The scales of AFM images were  $3\ \mu\text{m} \times 3\ \mu\text{m}$ .

Table S1 The thickness and surface roughnesses for different anti-solvent conditions. The  $R_q$  indicates the root mean square value.

|                        | LT-Mix | LT-T | LT-H | RT-Mix | RT-T | RT-H |
|------------------------|--------|------|------|--------|------|------|
| Thickness (nm)         | 126    | 195  | 214  | 238    | 268  | 216  |
| Roughness : $R_q$ (nm) | 7.3    | 41   | 19   | 31     | 32   | 65   |

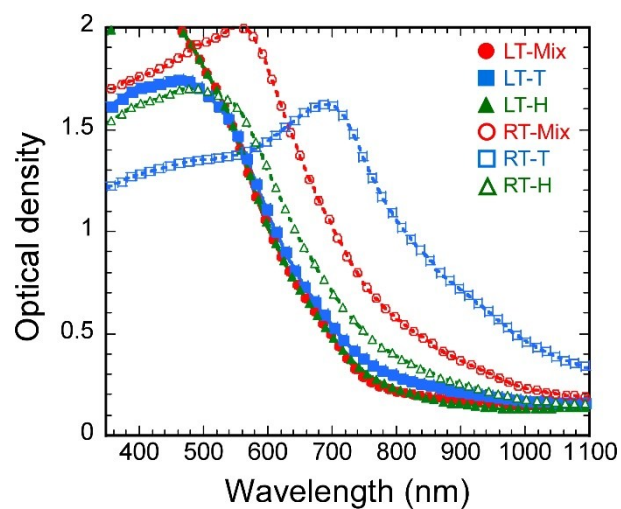

Fig. S4 Optical densities of perovskite films fabricated with the different anti-solvent conditions. The solid and open symbols indicate the temperature of the anti-solvents at 13 °C (LT-) and 25 °C (RT-), respectively. Whether toluene and hexane (Mix), toluene (T), or hexane (H) was used as the co-solvent is indicated by circles, squares, or triangles, respectively.

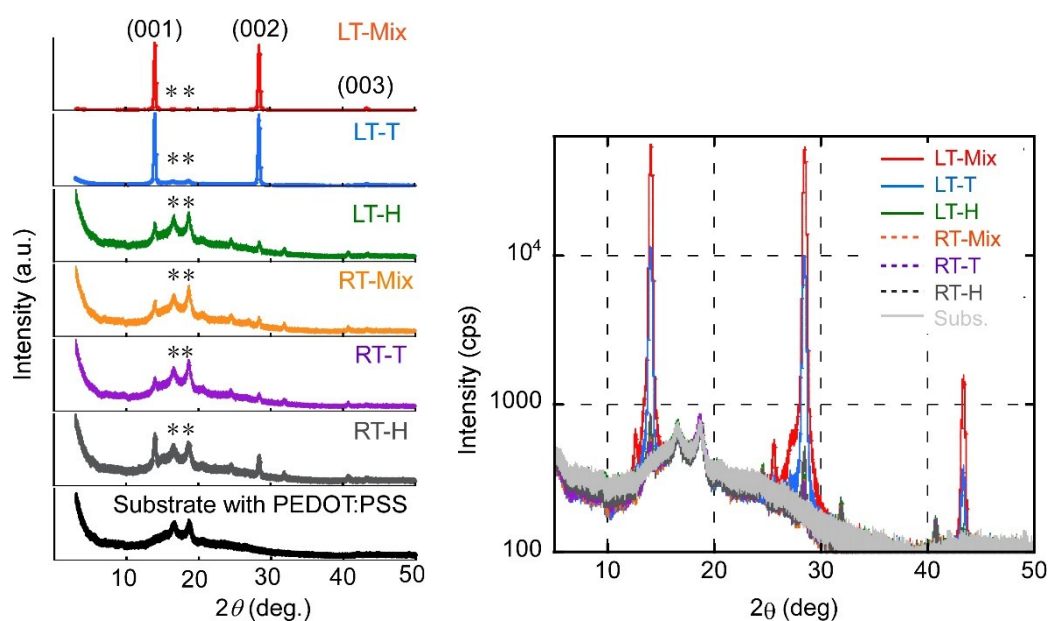

Fig. S5 (a) The X-ray diffraction spectra for the LT-Mix (red), LT-T (blue), LT-H (green), RT-Mix (orange), RT-T (purple), and RT-H (gray) conditions, as well as the substrate-only spectrum (Black). The asterisks indicate the peaks originating from the substrate with the dome type cover, which was employed protect the perovskite film from exposure to air. The semi-log plots of the data are shown in (b).

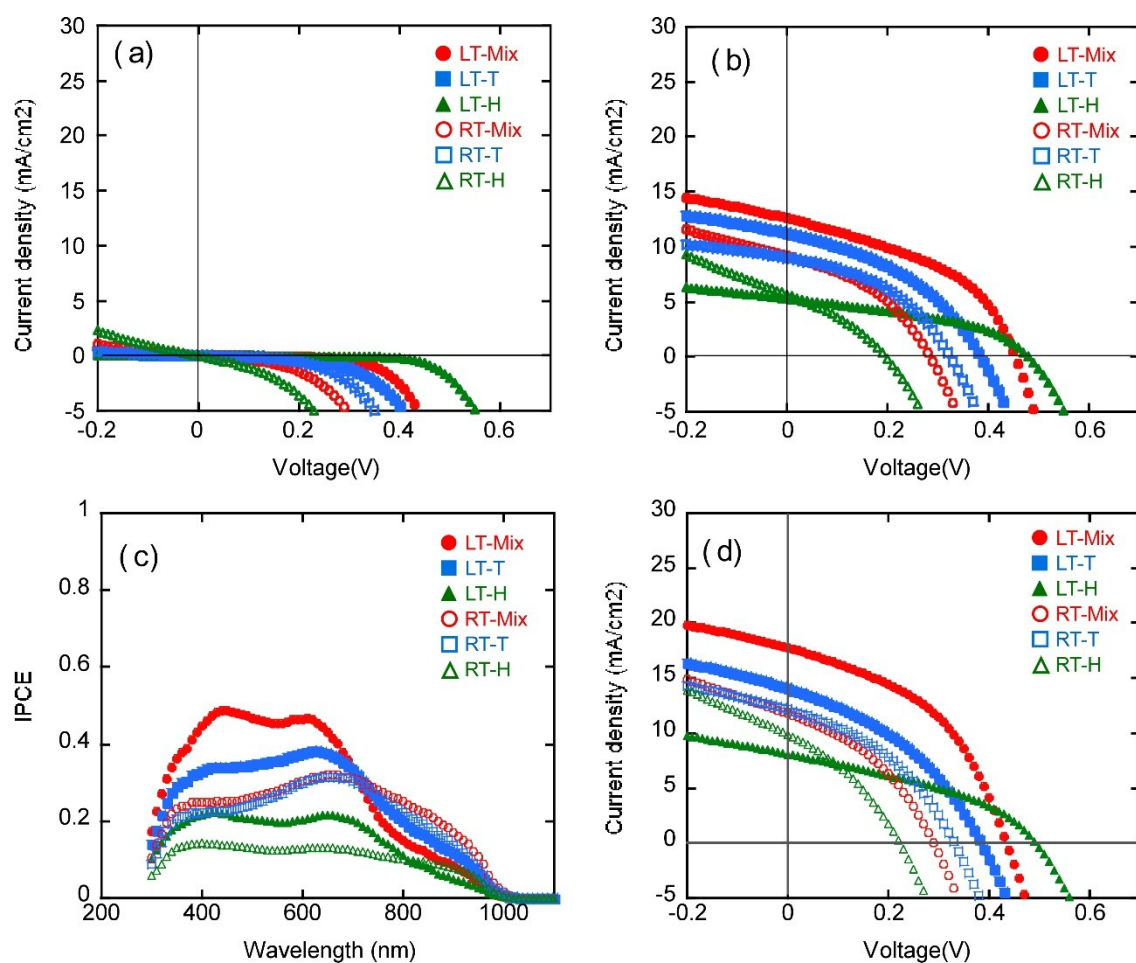

Fig. S6 Current–voltage characteristics and incident photon to electron conversion efficiency (IPCE) for the best performing cell under each anti-solvent condition. (a) Dark current (i.e., without light illumination). (b, d) Photocurrent measured with (1.8 mm × 1.8 mm) and without shadow mask (2 mm × 2 mm) under AM1.5 simulated sunlight of 100 mW/cm². (c) IPCE spectrum for different anti-solvent conditions.



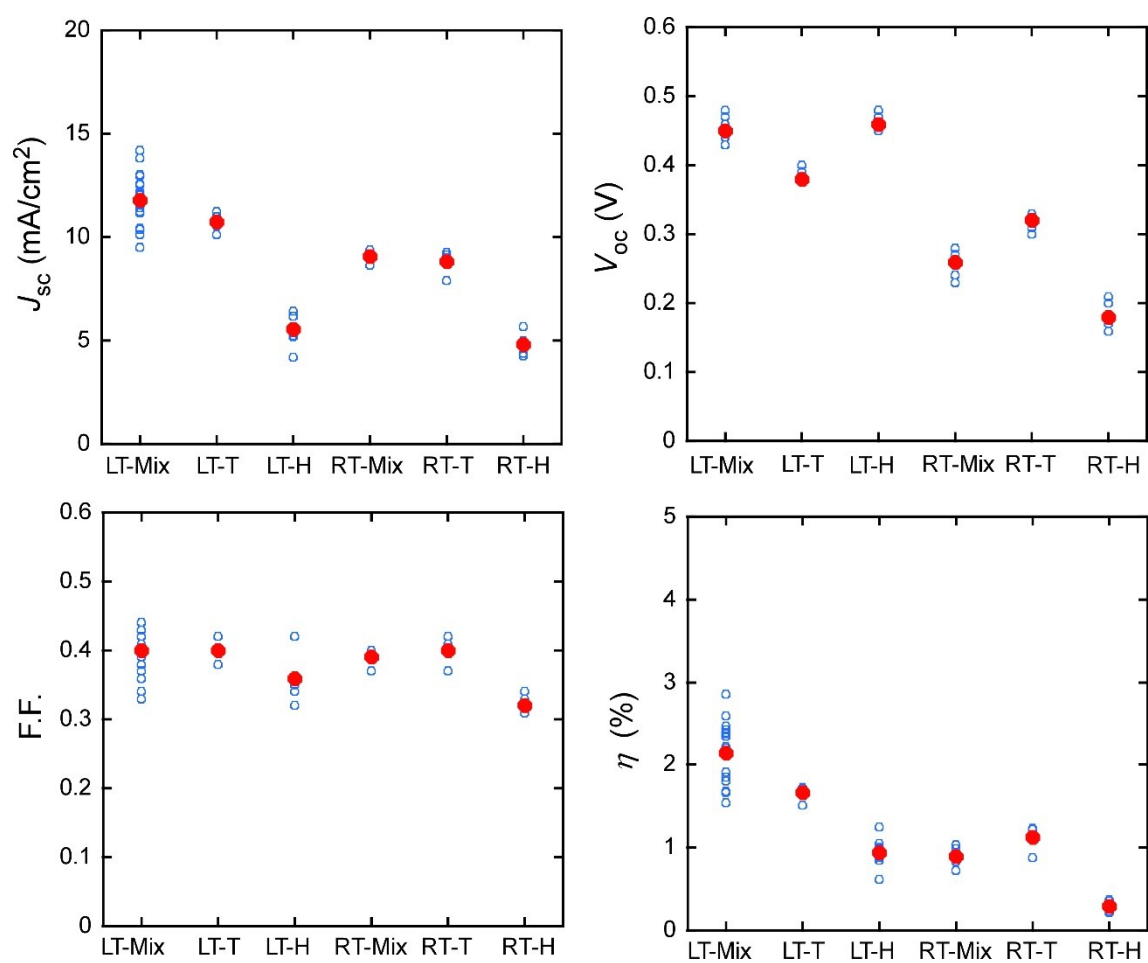

Fig. S7 Key photovoltaic parameters for different anti-solvent conditions. The measured and averaged values are indicated by open and solid circles, respectively. The evaluated number of cells was 20 for LT-Mix and between 4 and 8 for the other condition, respectively. The average values with their standard deviations are summarized in Table ESI-2.

Table S2 Key photovoltaic parameters for different anti-solvent conditions. The parameters were measured with the shadow mask in place. The measured number of cells was 20 for LT-Mix and between 4 and 8 for the other conditions.

|                                | LT-Mix       | LT-T         | LT-H        | RT-Mix      | RT-T        | RT-H        |
|--------------------------------|--------------|--------------|-------------|-------------|-------------|-------------|
| $J_{sc}$ (mA/cm <sup>2</sup> ) | 11.82 ± 1.20 | 10.73 ± 0.51 | 5.55 ± 0.71 | 9.05 ± 0.32 | 8.83 ± 0.62 | 4.84 ± 0.67 |
| $V_{oc}$ (V)                   | 0.45 ± 0.01  | 0.38 ± 0.01  | 0.46 ± 0.01 | 0.26 ± 0.03 | 0.32 ± 0.01 | 0.18 ± 0.02 |
| F.F.                           | 0.40 ± 0.03  | 0.40 ± 0.02  | 0.36 ± 0.04 | 0.39 ± 0.01 | 0.40 ± 0.02 | 0.32 ± 0.01 |
| $\eta$ (%)                     | 2.14 ± 0.35  | 1.66 ± 0.10  | 0.94 ± 0.18 | 0.89 ± 0.14 | 1.12 ± 0.16 | 0.29 ± 0.08 |

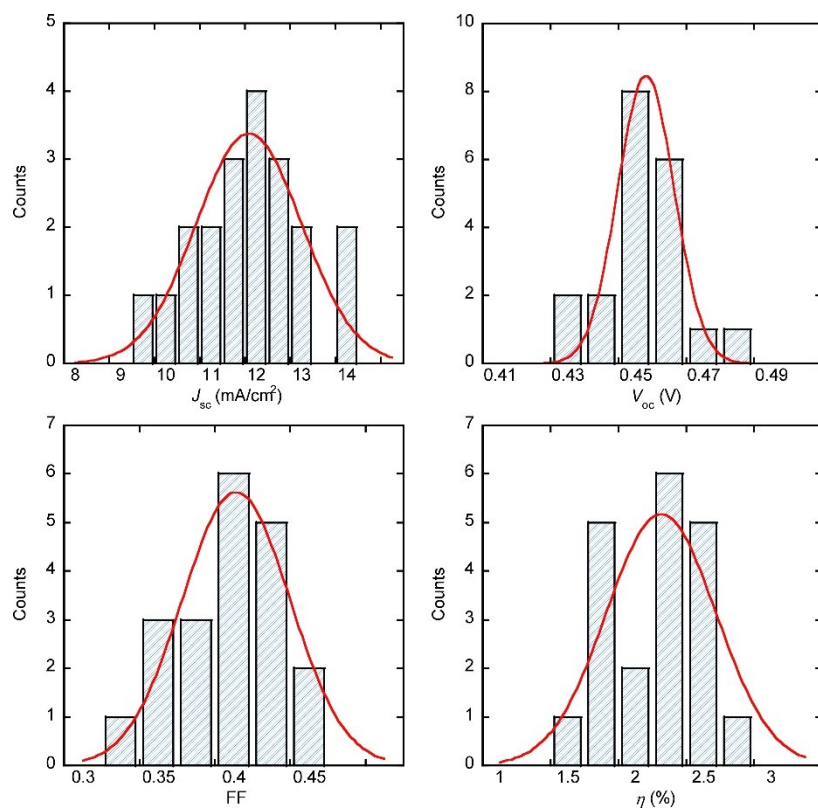

Fig. S8 Histograms of the photovoltaic parameters of 20 LT-Mix cells.

Table S3 Comparison of our photovoltaic device results with previously reported performances.

|                                      | $J_{sc}$ (mA/cm <sup>2</sup> ) | $V_{oc}$ (V)    | FF              | $\eta$ (%)      |
|--------------------------------------|--------------------------------|-----------------|-----------------|-----------------|
| <sup>a</sup> Modified SB             | 11.82 $\pm$ 1.20               | 0.45 $\pm$ 0.01 | 0.40 $\pm$ 0.03 | 2.14 $\pm$ 0.35 |
| <sup>b</sup> LT-VASP                 | 15.1 $\pm$ 3.08                | 0.22 $\pm$ 0.04 | 0.35 $\pm$ 0.03 | 1.16 $\pm$ 0.42 |
| <sup>c</sup> Excess SnI <sub>2</sub> | 12.30 $\pm$ 0.48               | 0.43 $\pm$ 0.06 | 0.40 $\pm$ 0.05 | 2.13 $\pm$ 0.53 |
| <sup>d</sup> Additive                | 23.44 $\pm$ 1.4                | 0.28 $\pm$ 0.02 | 0.56 $\pm$ 0.04 | 3.71 $\pm$ 0.38 |
| <sup>e</sup> FDC                     | 20.69 $\pm$ 0.95               | 0.45 $\pm$ 0.02 | 0.58 $\pm$ 0.03 | 5.41 $\pm$ 0.46 |

a) Modified solvent bathing method. (Average of 20 cells)

b) Low temperature vapor assisted solution process (Average of 12 cells)<sup>1</sup>

c) Employing PCBM for acceptor (Average of 14 cells)<sup>2</sup>

d) Pyrazine was used as an additive (Average of 36 cells)<sup>3</sup>

e) Diethyl ether was employed as an anti-solvent in FDC (Average of 30 cells)<sup>4</sup>

## References

- 1 T. Yokoyama, D. H. Cao, C. C. Stoumpos, T.-B. Song, Y. Sato, S. Aramaki and M. G. Kanatzidis, *J. Phys., Chem. Lett.*, 2016, **7**, 776-782.
- 2 K. P. Marshall, R. I. Walton and R. A. Hatton, *J. Mater. Chem. A*, 2015, **3**, 11631-11640.
- 3 S. J. Lee, S. S. Shin, Y. C. Kim, D. Kim, T. K. Ahn, J. H. Noh, J. Seo and S. Il Seok, *J. Am. Chem. Soc.*, 2016, **138**, 3974-3977.
- 4 W. Liao, D. Zhao, Y. Yu, C. R. Grice, C. Wang, A. J. Cimaroli, P. Schulz, W. Meng, K. Zhu, R.-G. Xiong and Y. Yan, *Adv. Mater.* 2016, DOI: 10.1002/adma.201602992.
